# Supplementary material for: Metal‐Organic Framework‐Derived Solid Catalyst for Biodiesel Production from Jatropha curcas Oil: Kinetic Study and Process Optimization Using Response Surface Methodology
Source: Hindawi journal article supplement (doi:10.1155/2024/6336617), 2024-01-01
Supplement: f1 [file 6336617.f1.docx]

**Supplementary Information**

**Metal Organic Framework-derived solid catalyst for biodiesel production from *Jatropha curcas* oil: Kinetic study and process optimization using response surface methodology**

*Hlawncheu Zohmingliana a,Joseph VL Ruatpuia a,Jasha Momo H. Anal b, Feng Chai c, Gopinath Halder d, Amarajothi Dhakshinamoorthy e, Samuel Lalthazuala Rokhum a,**

a Department of Chemistry, National Institute of Technology Silchar, Assam -788010, India

b Natural Products and Medicinal Chemistry Division, CSIR-Indian Institute of Integrative Medicine, Jammu 180001, India

c Department of Chemistry, Harbin Normal University, Harbin 150025, P. R. China

d Department of Chemical Engineering, National Institute of Technology Durgapur, Durgapur 713209, West Bengal, India

e School of Chemistry, Madurai Kamaraj University, Madurai 625 021, India

Corresponding authors emails: [rokhum@che.nits.ac.in](mailto:rokhum@che.nits.ac.in) (SLR)

| **Sl. No.** | **Caption** | **Figure** |
| --- | --- | --- |
|  | Experimental set up for biodiesel production | Figure. S1 |
|  | SEM images of the catalyst before calcination (a-c), EDS data (d), and TEM images of the catalyst (e and f). | Figure. S2 |
|  | Perturbation plot showing variables with a substantial impact on biodiesel yield. | Figure. S3 |
|  | GC-MS of synthesized biodiesel | Figure. S4 |
|  | TOF calculation | *Eq*. S1 |

| 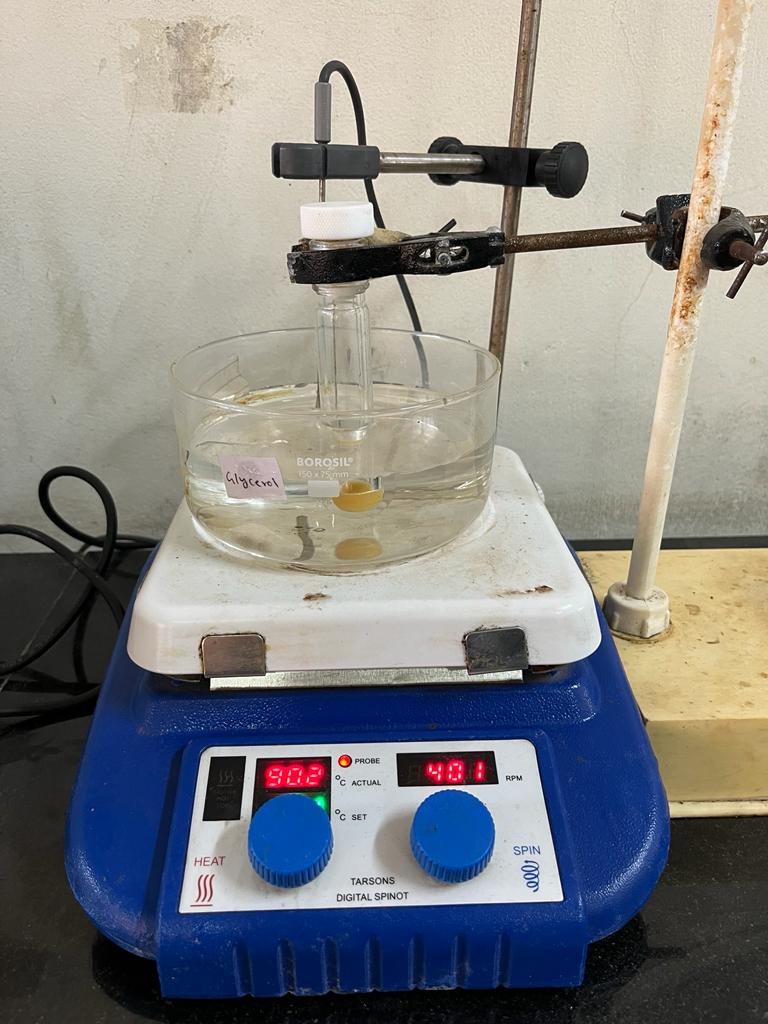 |
| --- |
| **Figure S1:** Experimental set up for biodiesel production. |

| 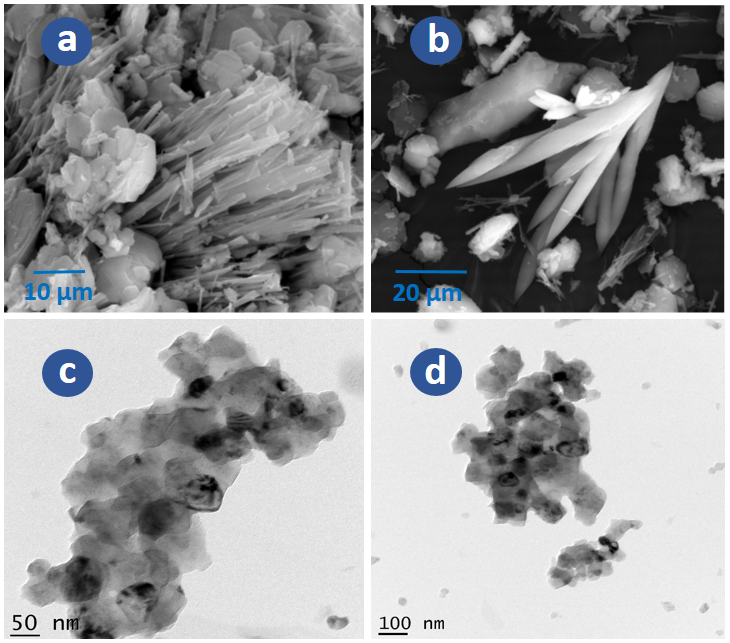 |
| --- |
| **Figure S2:** SEM images of the catalyst before calcination (a and b), and TEM images of the catalyst (c and d). |

| 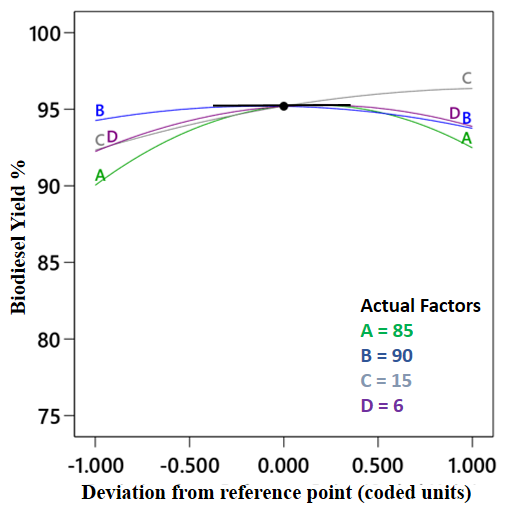 |
| --- |
| **Figure S3:** Perturbation plot showing variables with a substantial impact on biodiesel yield. |

| 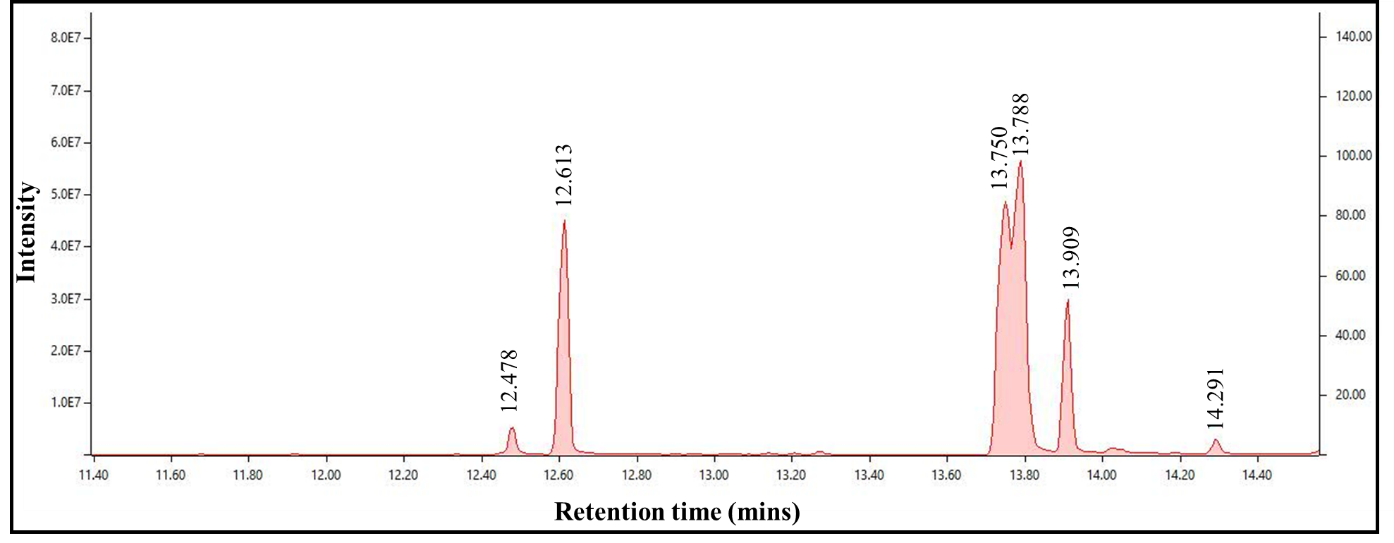 |
| --- |
| **Figure S4:** GC-MS of synthesized biodiesel. |

**TOF calculation**
